# Supplementary material for: Update of the scientific opinion on tetrabromobisphenol A (TBBPA) and its derivatives in food
Source: PubMed Central journal article supplement (PMC11247339; doi:10.2903/j.efsa.2024.8859), 2024-07-15
Supplement: EFS2-22-e8859-s001.pdf [file EFS2-22-e8859-s001.pdf]

Annex to: Update of the risk assessment on tetrabromobisphenol A (TBBPA) and its derivatives in food. doi:10.2903/j.efsa.2024.8859

© European Food Safety Authority, 2024

## ANNEX C - Benchmark dose modelling

This Annex contains the details of the benchmark dose (BMD) modelling performed on experimental animal data. It consists of an introductory subsection describing the approach followed in the modelling (Section A.1.) and the individual BMD reports per study (Section A.2.).

### 1. Introduction

In this section, a general description of the approach followed in the modelling is given.

#### 1.1. Selection of the benchmark response

The BMD is defined as the estimated dose that corresponds with a predefined change in response compared with the background response. The benchmark response (BMR) is the response corresponding with the estimated BMD of interest.

The Panel on Contaminants in the Food Chain (CONTAM Panel) selected a BMR of 10% for the neurodevelopmental effects. This percentage of variation is commonly used to reflect the natural variability of neurobehaviour end points in the absence of any biological consideration of severity to justify a different BMR. This is also in line with the approach taken for the update of the risk assessment on polybrominated diphenyl ethers (PBDEs) (EFSA CONTAM Panel, 2024). For the carcinogenicity, the Panel selected the default BMR of 10% for quantal data.

A 90% confidence interval around the BMD was estimated; the lower bound is reported by the benchmark dose lower confidence limit (BMDL) and the upper bound by the benchmark dose upper confidence limit (BMDU).

#### 1.2. Software used

Results are obtained using the European Food Safety Authority (EFSA) web-based tool for Bayesian BMD analysis, which uses the R package (BMABMDR; version 0.0.0.9073) for the underlying calculations.

#### 1.3. Specification of deviations from default assumptions

All the results were calculated using the bridge sampling as numerical method, which is more accurate and computationally demanding than the Laplace approximation set as a default (EFSA Scientific Committee, 2022).

The Panel selected the following default models:

A default set of fitted models for continuous end points

| Family | Model                      | $y   x \sim \mathbf{N}(\mu(x), \sigma^2)$<br>Dose-response function ( $\mu(x)$ )              | $y   x \sim \mathbf{LOGN}(\mu(x), \sigma^2)$<br>Dose-response function ( $e^{\mu(x)}$ )           |
|--------|----------------------------|-----------------------------------------------------------------------------------------------|---------------------------------------------------------------------------------------------------|
| 1a     | Exponential <sup>(i)</sup> | $a \cdot (1 + (c - 1) \cdot (1 - e^{-b \cdot x^d}))$                                          | $e^{a \cdot (1 + (c - 1) \cdot (1 - e^{-b \cdot x^d}))}$                                          |
|        | Inverse Exponential        | $a \cdot (1 + (c - 1) \cdot e^{-b \cdot x^d})$                                                | $e^{a \cdot (1 + (c - 1) \cdot e^{-b \cdot x^d})}$                                                |
|        | Hill <sup>(ii)</sup>       | $a \cdot (1 + (c - 1) \cdot (1 - \frac{b}{b + x^d}))$                                         | $e^{a \cdot (1 + (c - 1) \cdot (1 - \frac{b}{b + x^d}))}$                                         |
|        | Log-Normal                 | $a \cdot (1 + (c - 1) \cdot \Phi(\log(b) + d \cdot \log(x)))$                                 | $e^{a \cdot (1 + (c - 1) \cdot \Phi(\log(b) + d \cdot \log(x)))}$                                 |
| 1b     | Gamma <sup>(iii)</sup>     | $a \cdot (1 + (c - 1) \cdot \frac{\gamma(d, b \cdot x)}{\Gamma(d)})$                          | $e^{a \cdot (1 + (c - 1) \cdot \frac{\gamma(d, b \cdot x)}{\Gamma(d)})}$                          |
|        | LMS-two stage              | $a \cdot (1 + (c - 1) \cdot (1 - e^{-b \cdot x - d \cdot x^2}))$                              | $e^{a \cdot (1 + (c - 1) \cdot (1 - e^{-b \cdot x - d \cdot x^2}))}$                              |
| 2      | Probit increasing          | $a \cdot \Phi(c + b \cdot x^d)$                                                               | $e^{a \cdot \Phi(c + b \cdot x^d)}$                                                               |
|        | Probit decreasing          | $a \cdot (1 + \Phi(c)) - a \cdot \Phi(c + b \cdot x^d)$                                       | $e^{a \cdot (1 + \Phi(c)) - a \cdot \Phi(c + b \cdot x^d)}$                                       |
|        | Logistic increasing        | $a \cdot \frac{e^c + b \cdot x^d}{1 + e^c + b \cdot x^d}$                                     | $e^{a \cdot \frac{e^c + b \cdot x^d}{1 + e^c + b \cdot x^d}}$                                     |
|        | Logistic decreasing        | $a \cdot (1 + \frac{e^c}{1 + e^c}) - a \cdot \frac{e^c + b \cdot x^d}{1 + e^c + b \cdot x^d}$ | $e^{a \cdot (1 + \frac{e^c}{1 + e^c}) - a \cdot \frac{e^c + b \cdot x^d}{1 + e^c + b \cdot x^d}}$ |

Default set of fitted models for quantal end points

| Family | Model               | $y x \sim \text{Bernoulli}(\pi(x))$<br>Dose–response function ( $\mu(x)$ ) |
|--------|---------------------|----------------------------------------------------------------------------|
| 1a     | Exponential         | $a + (1 - a) \cdot (1 - e^{-b \cdot x^d})$                                 |
|        | Inverse Exponential | $a + (1 - a) \cdot e^{-b \cdot x^{-d}}$                                    |
|        | Hill                | $a + (1 - a) \cdot \left(1 - \frac{b}{b + x^d}\right)$                     |
|        | Log-Normal          | $a + (1 - a) \cdot \Phi(\log(b) + d \cdot \log(x))$                        |
| 1b     | Gamma               | $a + (1 - a) \cdot \frac{\gamma(d, b \cdot x)}{\Gamma(d)}$                 |
|        | LMS-two stage       | $a + (1 - a) \cdot (1 - e^{-b \cdot x - d \cdot x^2})$                     |
| 2      | Probit increasing   | $\Phi(a + b \cdot x^d)$                                                    |
|        | Logistic increasing | $\frac{e^{a+b \cdot x^d}}{1 + e^{a+b \cdot x^d}}$                          |

#### 1.4. Procedure for selection of the BMDL

Flow chart to derive a Reference Point from a dose–response data set of a specified end point using a benchmark dose (BMD) analysis.

BMDL: benchmark dose lower confidence limit; BMR: benchmark response; LOAEL: lowest-observed-adverse-effect level; NOAEL: no-observed-adverse-effect level.

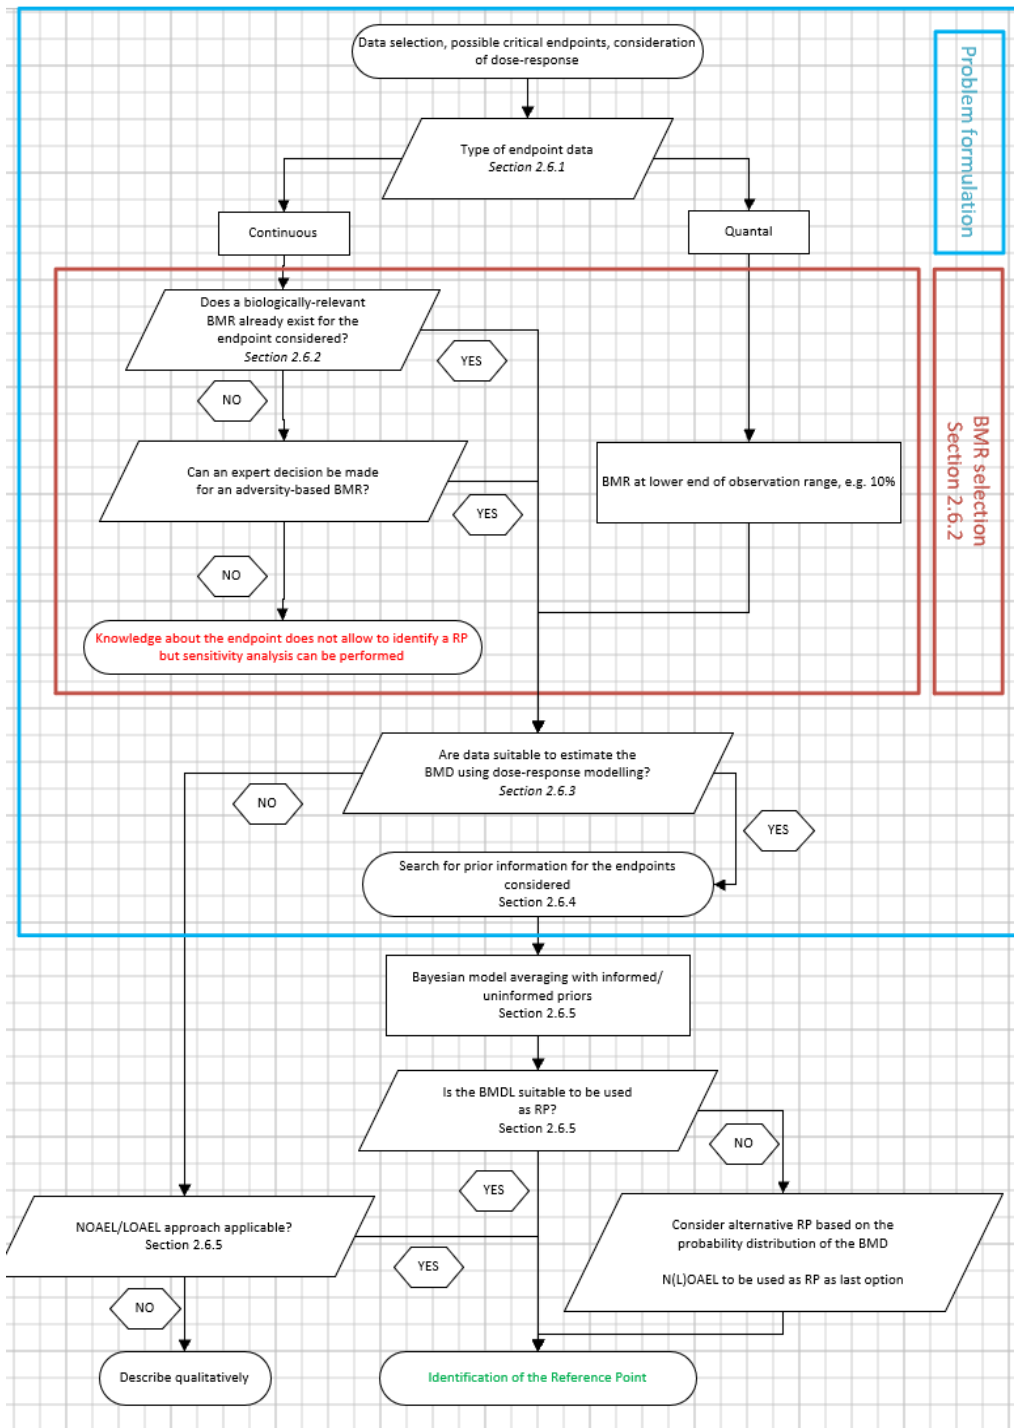

## 2. TBBPA–selected studies

### 2.1. Rock et al. (2019)–latency (seconds) to enter light box in male Wistar Han rats exposed by gavage to TBBPA from GD6 to PND90–model averaging

#### 2.1.1. Data description

The end point to be analysed is latency (s) to enter light box.

Data used for analysis

| TBBPA (mg/kg bw per day) | Latency (s) | SD    | N  |
|--------------------------|-------------|-------|----|
| 0.0                      | 18.04       | 15.15 | 10 |
| 0.1                      | 28.57       | 24.00 | 15 |
| 25.0                     | 42.34       | 34.18 | 9  |
| 250.0                    | 54.45       | 74.17 | 13 |

SD: standard deviation; TBBPA: tetrabromobisphenol A.

#### 2.1.2. Selection of the BMR

The BMR used is a 10% change in mean response compared to the controls. The BMD is the dose corresponding with the BMR of interest.

A 90% confidence interval around the BMD will be estimated; the lower bound is reported by the BMDL and the upper bound, by the BMDU.

#### 2.1.3. Results

##### Response variable: latency (s) to enter light box

Estimated BMDs per model

| Model  | BMDL    | BMD     | BMDU    | Model weights | Converged |
|--------|---------|---------|---------|---------------|-----------|
| E4_LN  | 59.013  | 333.550 | 701.515 | 0.125         | 1         |
| IE4_LN | 103.973 | 375.729 | 718.837 | 0.100         | 1         |
| H4_LN  | 60.078  | 316.492 | 697.766 | 0.130         | 1         |
| LN4_LN | 82.949  | 353.364 | 715.061 | 0.114         | 1         |
| G4_LN  | 56.686  | 269.998 | 694.723 | 0.122         | 0         |
| QE4_LN | 52.720  | 292.926 | 697.324 | 0.158         | 1         |
| P4_LN  | 62.354  | 336.052 | 708.772 | 0.126         | 1         |
| L4_LN  | 57.000  | 337.637 | 705.168 | 0.126         | 1         |

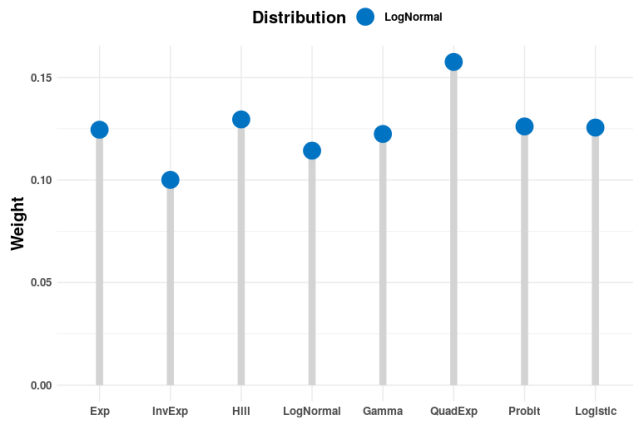

Final BMD values

| Sensitivity Analysis | Model          | Type | BMDL   | BMD     | BMDU    |
|----------------------|----------------|------|--------|---------|---------|
| default              | Model averaged | BS   | 61.484 | 329.471 | 707.425 |

Visualization

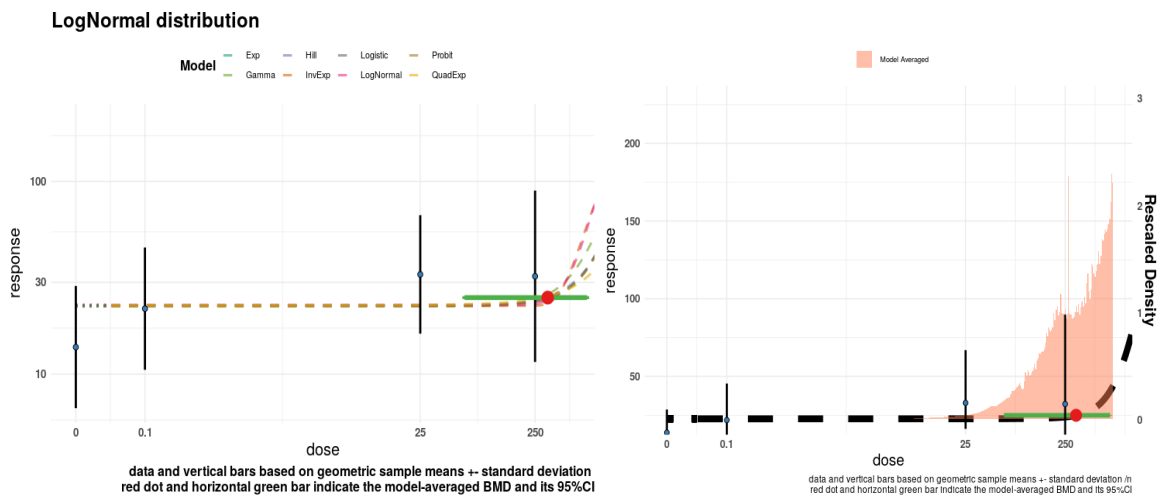

## 2.2. Rock et al. (2019)–light box entries (bouts) in male Wistar Han rats exposed by gavage to tetrabromobisphenol A from GD6 to PND90–model averaging

### 2.2.1. Data description

A. The end point to be analysed is light box entries.

Data used for analysis

| TBBPA (mg/kg bw per day) | Light box entries (bouts) | SD    | Animals (n) |
|--------------------------|---------------------------|-------|-------------|
| 0.0                      | 5.545                     | 1.368 | 11          |
| 0.1                      | 5.400                     | 2.063 | 15          |
| 25.0                     | 4.600                     | 2.413 | 10          |
| 250.0                    | 4.308                     | 2.463 | 13          |

SD: standard deviation; TBBPA: tetrabromobisphenol

### 2.2.2. Selection of the BMR

The BMR used is a 10% change in mean response compared to the controls. The BMD is the dose corresponding with the BMR of interest.

A 90% confidence interval around the BMD will be estimated; the lower bound is reported by the BMDL and the upper bound, by the BMDU.

### 2.2.3. Results

Response variable: **light box entries**

Estimated BMDs per model

| Model  | BMDL   | BMD     | BMDU    | Model weights | Converged |
|--------|--------|---------|---------|---------------|-----------|
| E4_N   | 69.387 | 356.868 | 709.136 | 0.122         | 1         |
| IE4_N  | 72.473 | 343.951 | 701.363 | 0.106         | 1         |
| H4_N   | 70.319 | 342.623 | 703.276 | 0.132         | 1         |
| LN4_N  | 86.119 | 371.808 | 713.613 | 0.111         | 1         |
| G4_N   | 70.198 | 320.425 | 702.967 | 0.129         | 1         |
| QE4_N  | 81.648 | 345.811 | 700.744 | 0.158         | 1         |
| P4_N   | 77.408 | 375.481 | 716.956 | 0.121         | 1         |
| L4_N   | 84.323 | 371.456 | 706.077 | 0.118         | 1         |
| E4_LN  | 38.374 | 257.677 | 708.893 | 0.000         | 1         |
| IE4_LN | 30.523 | 238.558 | 691.332 | 0.000         | 1         |
| H4_LN  | 26.672 | 237.167 | 687.318 | 0.000         | 1         |
| LN4_LN | 30.068 | 247.618 | 688.115 | 0.000         | 1         |
| G4_LN  | 35.155 | 260.021 | 719.013 | 0.000         | 1         |
| QE4_LN | 46.813 | 208.225 | 669.437 | 0.000         | 1         |
| P4_LN  | 36.869 | 264.529 | 690.416 | 0.000         | 1         |
| L4_LN  | 21.689 | 266.195 | 681.358 | 0.000         | 1         |

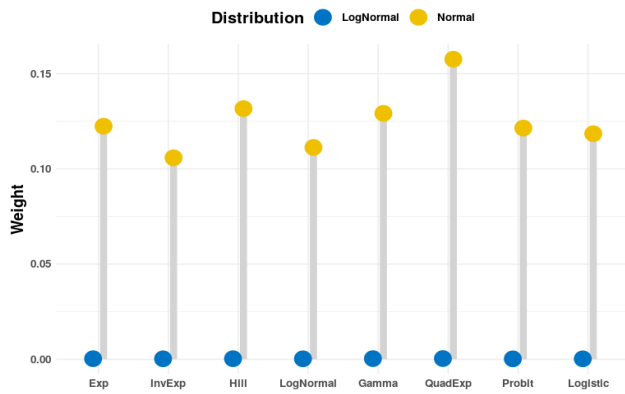

Final BMD values

| Sensitivity Analysis | Model          | Type | BMDL   | BMD     | BMDU    |
|----------------------|----------------|------|--------|---------|---------|
| default              | Model averaged | BS   | 77.572 | 353.357 | 706.588 |

Visualization

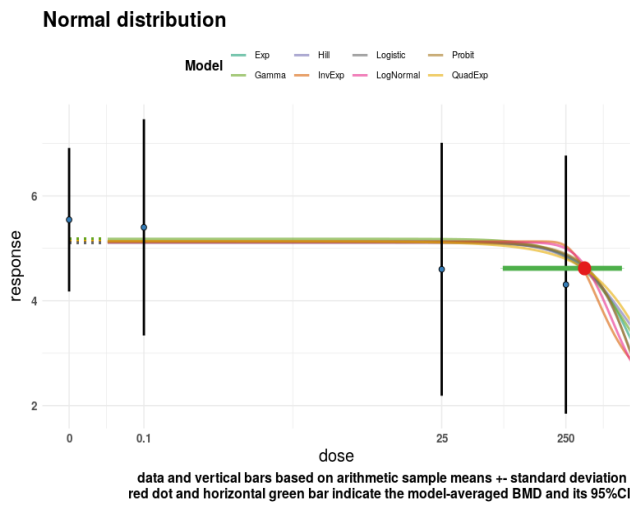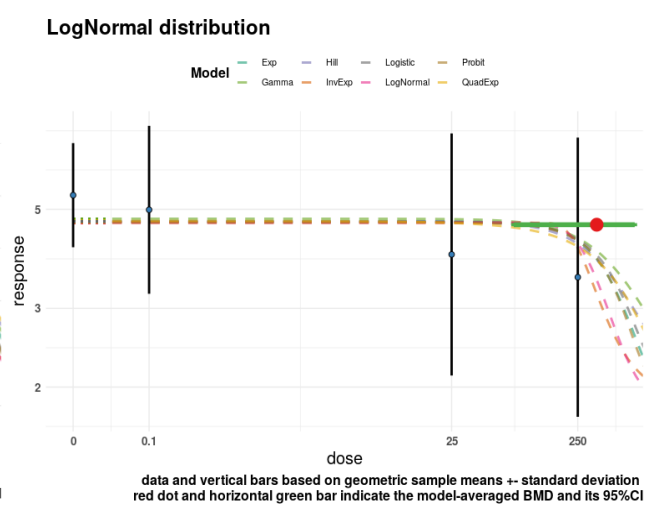



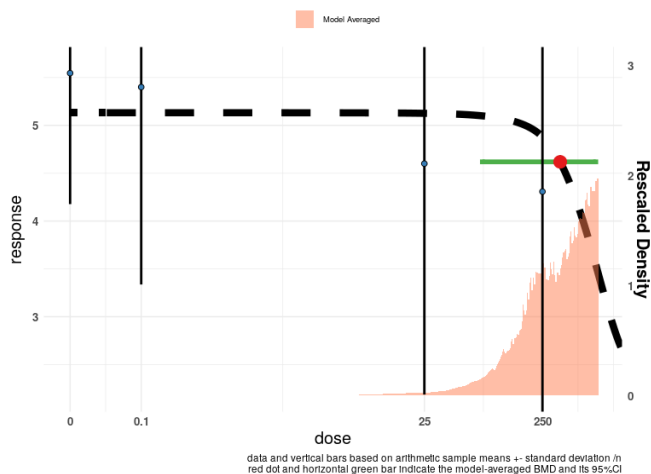

### 2.3. Rock et al. (2019)–open arms entries (n) in Male Wistar Han rats exposed by gavage to TBBPA from GD6 to PND90–model averaging

#### 2.3.1. Data description

The end point to be analysed is open arms entries (n).

Data used for analysis

| TBBPA (mg/kg bw per day) | Open arms entries (n) | SD    | Animals (n) |
|--------------------------|-----------------------|-------|-------------|
| 0.0                      | 5.364                 | 1.963 | 11          |
| 0.1                      | 4.200                 | 2.396 | 15          |
| 25.0                     | 3.500                 | 2.415 | 10          |
| 250.0                    | 3.077                 | 1.382 | 13          |

SD: standard deviation; TBBPA: tetrabromobisphenol A.

#### 2.3.2. Selection of the BMR

The BMR used is a 10% change in mean response compared to the controls. The BMD is the dose corresponding with the BMR of interest.

A 90% confidence interval around the BMD will be estimated; the lower bound is reported by the BMDL, and the upper bound, by the BMDU.

#### 2.3.4. Results

Response variable: **open arms entries**

Estimated BMDs per model

| Model | BMDL  | BMD     | BMDU    | Model weights | Converged |
|-------|-------|---------|---------|---------------|-----------|
| E4_N  | 8.364 | 155.595 | 649.496 | 0.000         | 1         |
| IE4_N | 8.058 | 162.963 | 653.709 | 0.000         | 1         |

|        |        |         |         |       |   |
|--------|--------|---------|---------|-------|---|
| H4_N   | 8.783  | 158.845 | 658.200 | 0.000 | 1 |
| LN4_N  | 7.722  | 155.101 | 648.051 | 0.000 | 1 |
| G4_N   | 10.462 | 239.801 | 709.703 | 0.000 | 1 |
| QE4_N  | 7.404  | 149.842 | 639.636 | 0.000 | 1 |
| E4_LN  | 3.218  | 132.714 | 648.672 | 0.118 | 1 |
| IE4_LN | 3.664  | 137.101 | 659.787 | 0.106 | 1 |
| H4_LN  | 4.294  | 143.255 | 649.381 | 0.117 | 1 |
| LN4_LN | 3.331  | 140.315 | 653.928 | 0.106 | 1 |
| G4_LN  | 8.398  | 285.722 | 704.766 | 0.192 | 0 |
| QE4_LN | 3.369  | 134.033 | 657.210 | 0.132 | 1 |
| L4_LN  | 3.267  | 144.947 | 646.443 | 0.112 | 1 |

Weights for model averaging

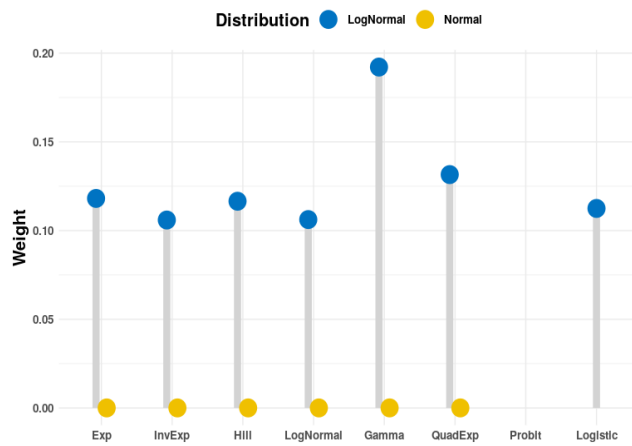

Final BMD values

| Model          | Type | BMDL  | BMD     | BMDU    |
|----------------|------|-------|---------|---------|
| Model Averaged | BS   | 3.451 | 141.018 | 655.466 |

Visualization

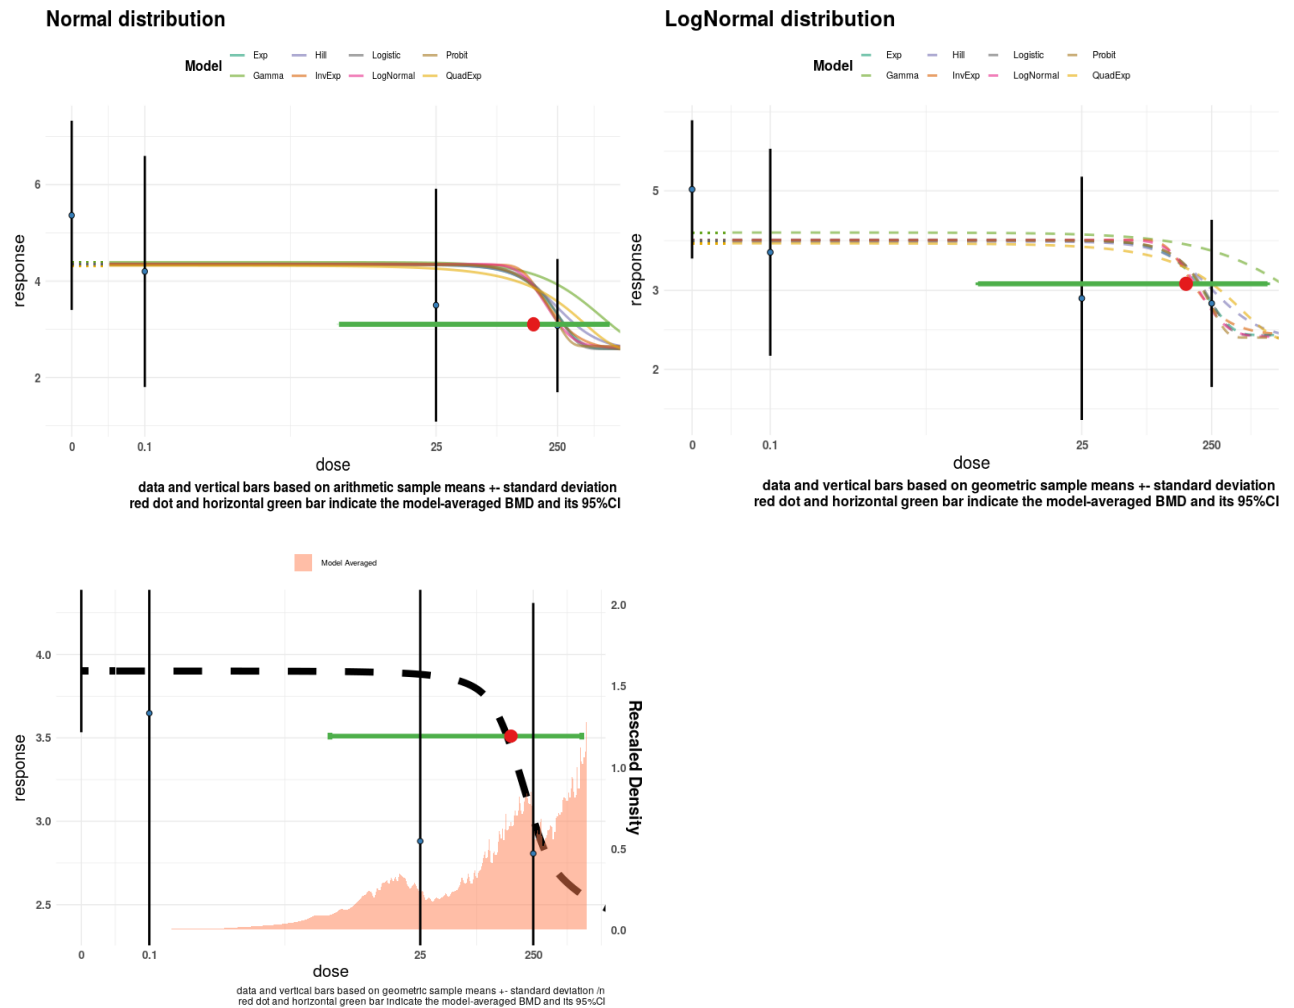

## 2.4. Kim et al. (2017)–learning and memory in a passive avoidance test (day 2) in adult male C57Bl6/J mice exposed by gavage to TBBPA for 2 weeks–model averaging

### 2.4.1. Data description

The end point to be analysed is latency (s).

Data used for analysis

| TBBPA (mg/kg bw per day) | Latency (s) | SE   | Animals (n) |
|--------------------------|-------------|------|-------------|
| 0                        | 241         | 20.9 | 7           |
| 20                       | 194         | 23.2 | 7           |
| 100                      | 152         | 27.2 | 7           |
| 500                      | 134         | 34.5 | 7           |

SE: standard error; TBBPA: tetrabromobisphenol A.

### 2.4.2. Selection of the BMR

The BMR used is a 10% change in mean response compared to the controls. The BMD is the dose corresponding with the BMR of interest.

A 90% confidence interval around the BMD will be estimated; the lower bound is reported by BMDL and the upper bound by BMDU.

### 2.4.3. Results

Response variable: **latency**

Estimated BMDs per model

| Model  | BMDL   | BMD     | BMDU     | Model weights | Converged |
|--------|--------|---------|----------|---------------|-----------|
| E4_N   | 11.652 | 140.935 | 1241.909 | 0.038         | 1         |
| IE4_N  | 10.051 | 99.472  | 1170.258 | 0.036         | 1         |
| H4_N   | 10.562 | 112.904 | 1209.304 | 0.039         | 1         |
| LN4_N  | 11.336 | 120.672 | 1206.492 | 0.036         | 1         |
| G4_N   | 14.785 | 611.643 | 1422.195 | 0.065         | 0         |
| QE4_N  | 8.893  | 111.750 | 1190.753 | 0.045         | 1         |
| P4_N   | 12.290 | 150.653 | 1219.777 | 0.037         | 1         |
| L4_N   | 12.139 | 148.133 | 1227.110 | 0.038         | 1         |
| E4_LN  | 10.367 | 75.783  | 850.056  | 0.076         | 1         |
| IE4_LN | 11.722 | 71.719  | 567.648  | 0.076         | 1         |
| H4_LN  | 9.460  | 66.562  | 611.113  | 0.074         | 1         |
| LN4_LN | 11.102 | 71.536  | 600.092  | 0.077         | 1         |
| G4_LN  | 16.135 | 91.568  | 1371.061 | 0.130         | 0         |
| QE4_LN | 6.916  | 53.121  | 808.783  | 0.083         | 1         |
| P4_LN  | 11.204 | 73.409  | 825.331  | 0.076         | 1         |
| L4_LN  | 11.037 | 71.618  | 783.344  | 0.075         | 1         |

Weights for model averaging

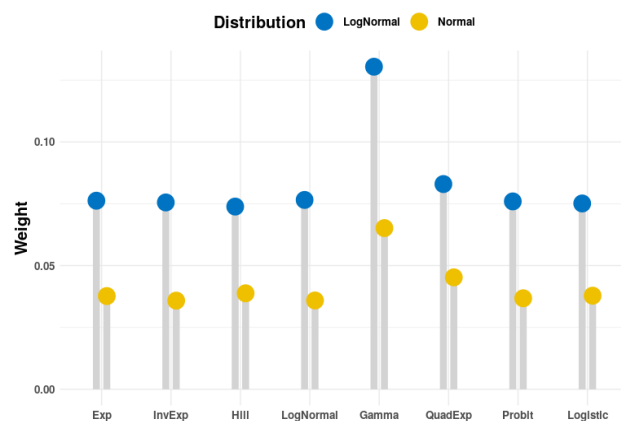

Final BMD values

| Model          | Type | BMDL   | BMD    | BMDU      |
|----------------|------|--------|--------|-----------|
| Model averaged | BS   | 10.283 | 79.292 | 1,007.641 |

Visualization

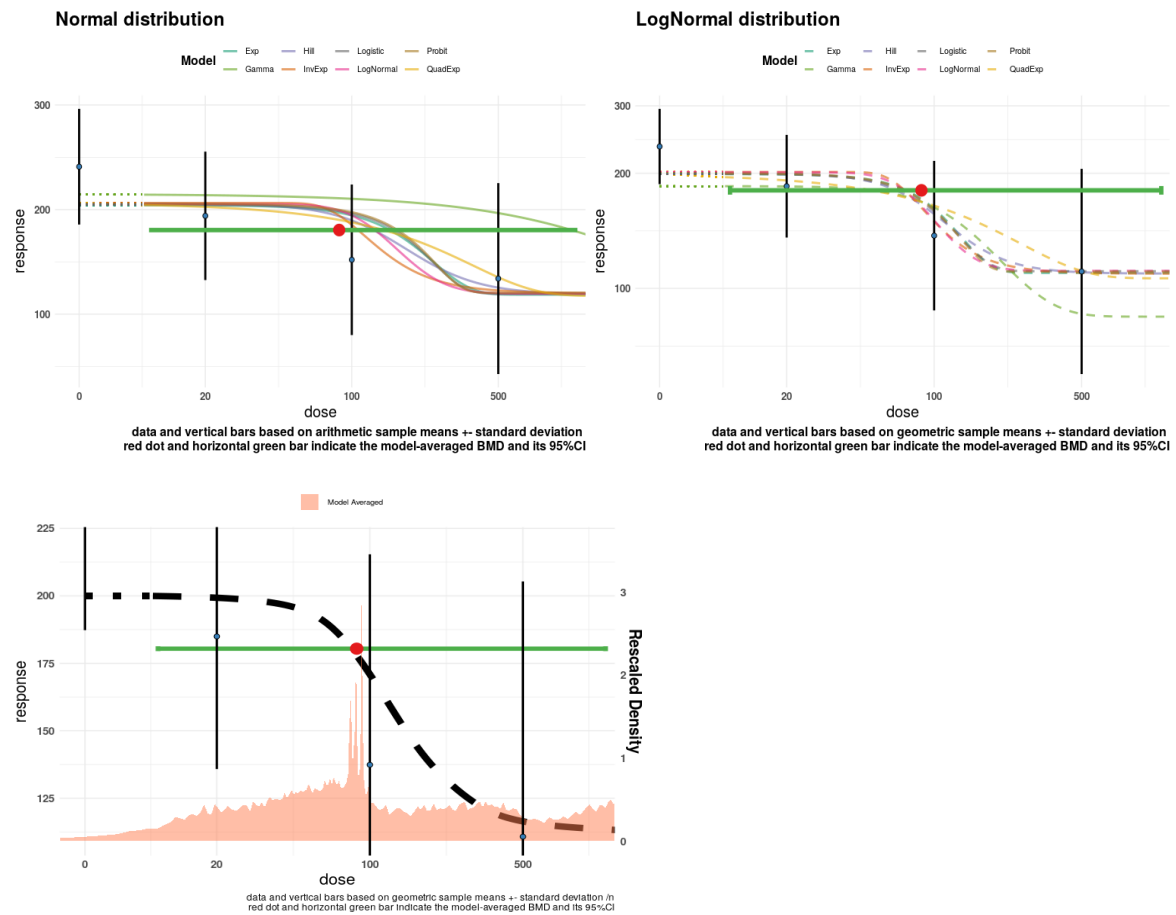

## 2.5. Cope et al. (2015)–brain parietal thickness in Sprague-Dawley Rats male/female pups exposed by gavage to TBBPA for 10 weeks prior to mating plus 3 weeks of gestation/lactation–model averaging

### 2.5.1. Data description

The end point to be analysed is brain parietal thickness.

Data used for analysis

| TBBPA (mg/kg bw per day) | Brain parietal thickness (mm) | SD    | Animals (n) |
|--------------------------|-------------------------------|-------|-------------|
| 0                        | 1.61                          | 0.188 | 10          |
| 10                       | 1.56                          | 0.104 | 10          |
| 100                      | 1.49                          | 0.100 | 10          |
| 1000                     | 1.23                          | 0.113 | 10          |

SD: standard deviation; TBBPA: tetrabromobisphenol A.

### 2.5.2. Selection of the BMR

The BMR used is a 10% change in mean response compared to the controls. The BMD is the dose corresponding with the BMR of interest.

A 90% confidence interval around the BMD will be estimated; the lower bound is reported by the BMDL, and the upper bound, by the BMDU.

### 2.5.3. Results

Response variable: **brain parietal thickness**

Estimated BMDs per model

| Model  | BMDL    | BMD     | BMDU    | Model weights | Converged |
|--------|---------|---------|---------|---------------|-----------|
| E4_N   | 122.828 | 429.899 | 835.615 | 0.037         | 1         |
| IE4_N  | 140.130 | 560.385 | 891.177 | 0.024         | 1         |
| H4_N   | 123.595 | 391.320 | 834.786 | 0.044         | 1         |
| LN4_N  | 140.158 | 561.231 | 919.387 | 0.030         | 0         |
| G4_N   | 136.145 | 430.944 | 802.824 | 0.045         | 1         |
| QE4_N  | 273.634 | 483.693 | 686.980 | 0.068         | 1         |
| P4_N   | 117.099 | 435.589 | 851.530 | 0.030         | 1         |
| L4_N   | 128.023 | 460.799 | 881.007 | 0.035         | 1         |
| E4_LN  | 127.011 | 445.978 | 834.464 | 0.102         | 1         |
| IE4_LN | 154.450 | 642.231 | 922.314 | 0.067         | 1         |
| H4_LN  | 134.350 | 478.162 | 917.427 | 0.110         | 0         |
| LN4_LN | 152.130 | 595.964 | 897.839 | 0.072         | 1         |
| G4_LN  | 145.624 | 458.981 | 796.514 | 0.125         | 1         |
| QE4_LN | 288.079 | 470.643 | 660.396 | 0.197         | 1         |

Weights for model averaging

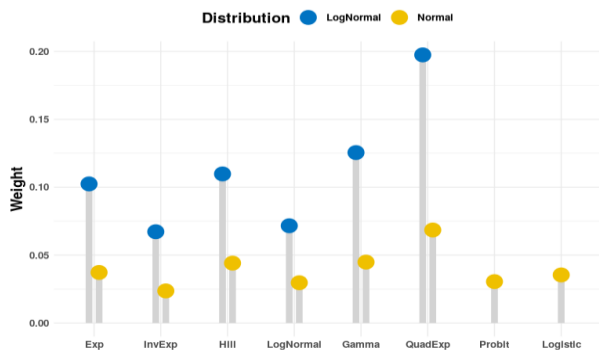

Final BMD values

| Model          | Type | BMDL    | BMD     | BMDU    |
|----------------|------|---------|---------|---------|
| Model averaged | BS   | 154.401 | 475.501 | 845.274 |

Visualization

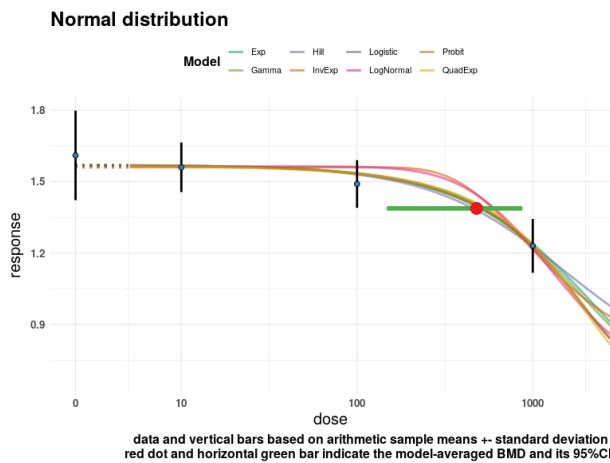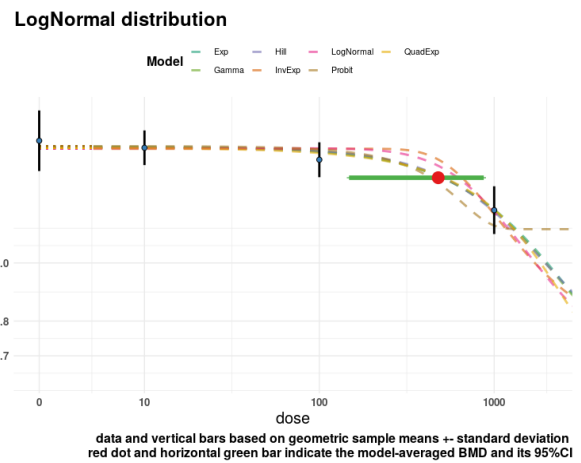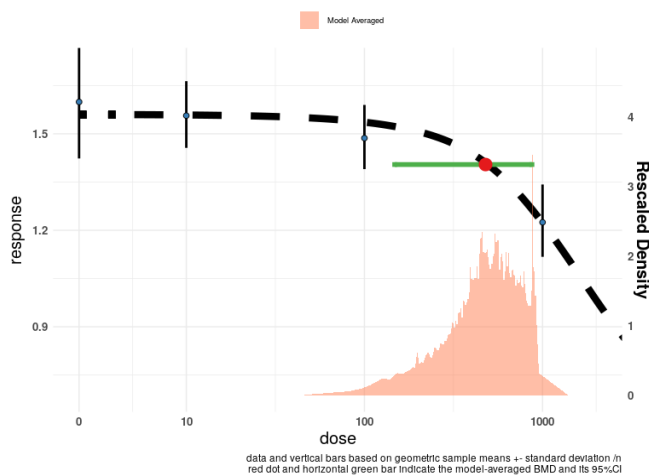

## 2.6. NTP (2014)–uterus adenocarcinoma (n) in female Wistar Han rats exposed by gavage for 2 years to TBBPA–model averaging

### 2.6.1. Data description

The end point to be analysed is uterus adenocarcinoma.

Data used for analysis

| TBBPA (mg/kg bw per day) | Uterus adenocarcinoma (n) | Animals (n) |
|--------------------------|---------------------------|-------------|
| 0.0                      | 4                         | 50          |
| 178.6                    | 10                        | 50          |
| 357.0                    | 15                        | 50          |
| 714.0                    | 16                        | 50          |

TBBPA: tetrabromobisphenol A.

### 2.6.2. Selection of the BMR

The BMR used is 10%, set as the default value for quantal data. The BMD is the dose corresponding with the BMR of interest.

A 90% confidence interval around the BMD will be estimated; the lower bound is reported by the BMDL, and the upper bound, by the BMDU.

### 2.6.3. Results

Response variable: **uterus adenocarcinoma**

Estimated BMDs per model

| Model | BMDL    | BMD     | BMDU     | Model weights | Converged |
|-------|---------|---------|----------|---------------|-----------|
| E4_Q  | 74.192  | 275.125 | 1346.092 | 0.140         | 1         |
| IE4_Q | 83.918  | 253.777 | 1132.251 | 0.055         | 1         |
| H4_Q  | 67.476  | 260.823 | 1240.842 | 0.163         | 1         |
| LN4_Q | 83.247  | 283.291 | 1338.865 | 0.073         | 1         |
| G4_Q  | 79.374  | 283.940 | 903.016  | 0.142         | 1         |
| QE4_Q | 177.883 | 319.193 | 968.123  | 0.248         | 1         |
| P4_Q  | 81.945  | 331.960 | 1434.465 | 0.093         | 1         |
| L4_Q  | 90.544  | 357.605 | 1545.080 | 0.087         | 1         |

Weights for model averaging



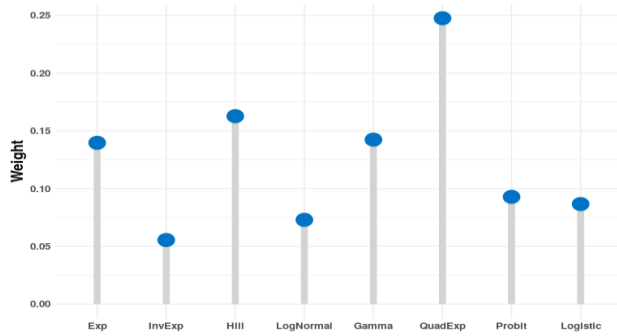

Final BMD values

| Model          | Type | BMDL  | BMD     | BMDU      |
|----------------|------|-------|---------|-----------|
| Model averaged | BS   | 88.11 | 297.462 | 1,175.243 |

Visualization

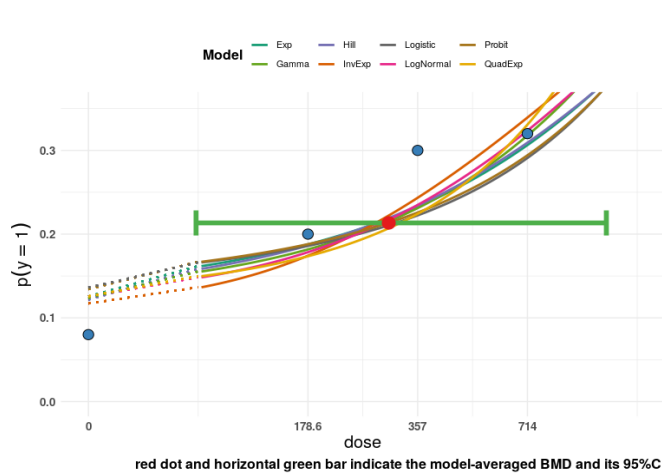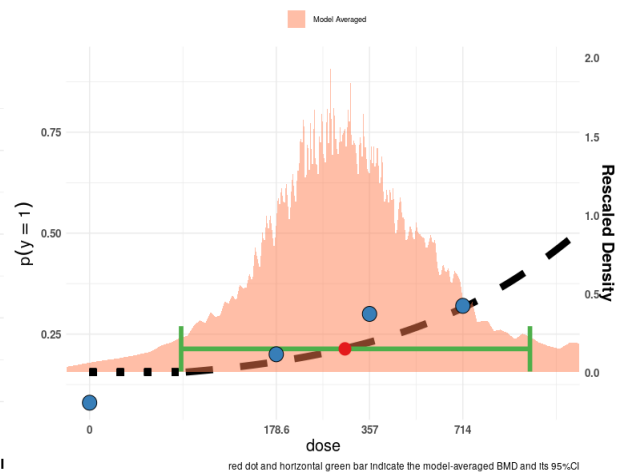

## 2.7. NTP (2014)–uterus adenoma, adenocarcinoma, and MMMT combined (n) in female Wistar Han rats exposed by gavage for 2 years to TBBPA–model averaging

### 2.7.1. Data description

The end point to be analysed is uterus adenoma, adenocarcinoma, and malignant mixed Mullerian tumour (MMMT) combined.

Data used for analysis

| TBBPA (mg/kg bw per day) | Uterus adenoma, adenocarcinoma, and MMMT combined (n) | Animals (n) |
|--------------------------|-------------------------------------------------------|-------------|
| 0.0                      | 6                                                     | 50          |
| 178.6                    | 11                                                    | 50          |
| 357.0                    | 16                                                    | 50          |
| 714.0                    | 19                                                    | 50          |

MMMT: malignant mixed Mullerian tumour; TBBPA: tetrabromobisphenol A.

### 2.7.2. Selection of the BMR

The BMR used is 10%, set as the default value for quantal data. The BMD is the dose corresponding with the BMR of interest.

A 90% confidence interval around the BMD will be estimated; the lower bound is reported by the BMDL, and the upper bound, by the BMDU.

### 2.7.3. Results

Response variable: **uterus adenoma, adenocarcinoma, and MMMT combined**

Estimated BMDs per model

| Model | BMDL    | BMD     | BMDU     | Model weights | Converged |
|-------|---------|---------|----------|---------------|-----------|
| E4_Q  | 87.011  | 318.840 | 1348.799 | 0.125         | 1         |
| IE4_Q | 112.610 | 332.835 | 1303.863 | 0.062         | 1         |
| H4_Q  | 88.325  | 307.106 | 1393.270 | 0.144         | 1         |
| LN4_Q | 112.661 | 346.417 | 1408.934 | 0.075         | 1         |
| G4_Q  | 105.572 | 325.639 | 979.846  | 0.140         | 1         |
| QE4_Q | 173.189 | 311.137 | 956.186  | 0.268         | 1         |
| P4_Q  | 113.525 | 385.722 | 1416.492 | 0.093         | 1         |
| L4_Q  | 107.085 | 382.125 | 1547.763 | 0.092         | 1         |

Weights for model averaging

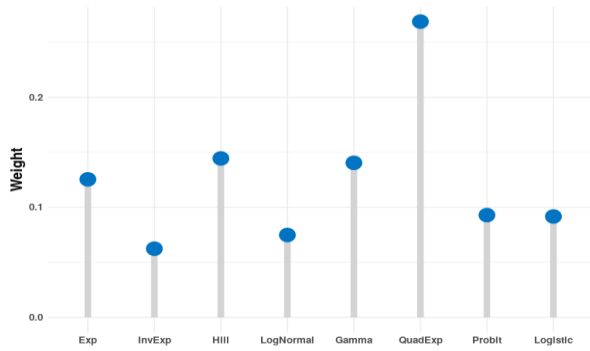

Final BMD values

| Model          | Type | BMDL   | BMD     | BMDU     |
|----------------|------|--------|---------|----------|
| Model averaged | BS   | 114.68 | 326.786 | 1,235.81 |
|                |      |        |         | 1        |

Visualization

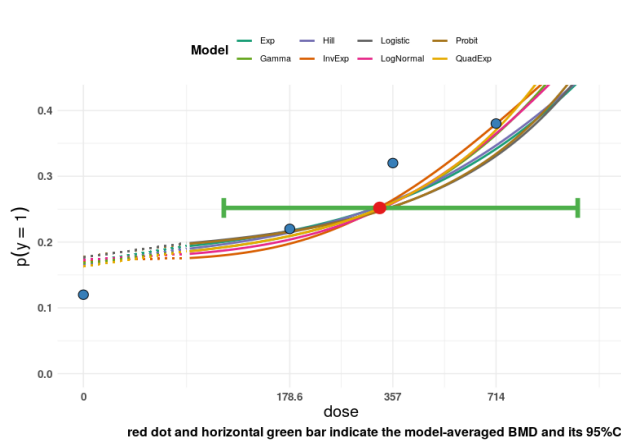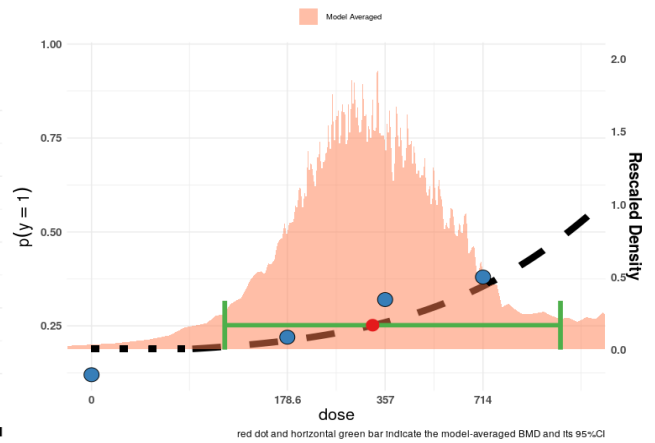

## 2.8. NTP (2014)–testis interstitial cell adenoma (n) in Male Wistar Han rats exposed by gavage for 2 years to TBBPA–model averaging

### 2.8.1. Data description

The end point to be analysed is testis interstitial cell adenoma.

Data used for analysis

| TBBPA (mg/kg bw per day) | Testis interstitial cell adenoma (n) | Animals (n) |
|--------------------------|--------------------------------------|-------------|
| 0.0                      | 0                                    | 50          |
| 178.6                    | 0                                    | 50          |
| 357.0                    | 1                                    | 50          |
| 714.0                    | 3                                    | 50          |

TBBPA: tetrabromobisphenol A.

### 2.8.2. Selection of the BMR

The BMR used is 10%, set as the default value for quantal data. The BMD is the dose corresponding with the BMR of interest.

A 90% confidence interval around the BMD will be estimated; the lower bound is reported by the BMDL, and the upper bound, by the BMDU.

### 2.8.3. Results

Response variable: **testis interstitial cell adenoma**

Estimated BMDs per model

| Model | BMDL    | BMD      | BMDU     | Model weights | Converged |
|-------|---------|----------|----------|---------------|-----------|
| E4_Q  | 743.380 | 1226.147 | 2006.979 | 0.131         | 1         |
| IE4_Q | 710.255 | 1064.905 | 2000.224 | 0.080         | 1         |
| H4_Q  | 740.764 | 1216.843 | 2020.729 | 0.140         | 1         |
| LN4_Q | 718.137 | 1111.605 | 2025.088 | 0.103         | 1         |
| G4_Q  | 679.819 | 1147.503 | 1941.979 | 0.141         | 0         |
| QE4_Q | 829.340 | 1431.232 | 2066.804 | 0.207         | 1         |

Weights for model averaging

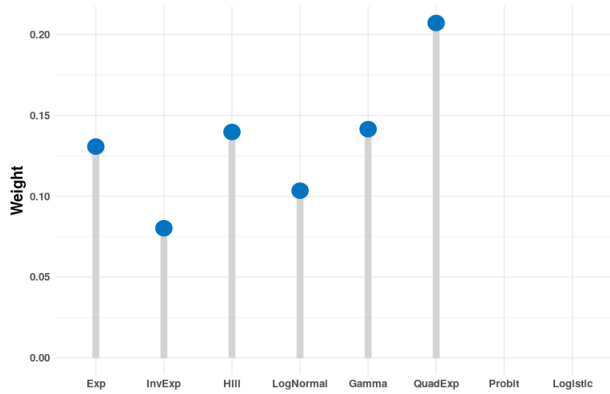

Final BMD values

| Model          | Type | BMDL    | BMD       | BMDU      |
|----------------|------|---------|-----------|-----------|
| Model averaged | BS   | 733.778 | 1,226.079 | 2,025.379 |

Visualization

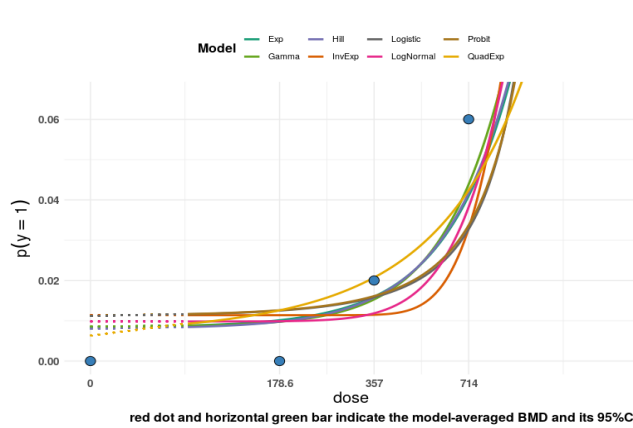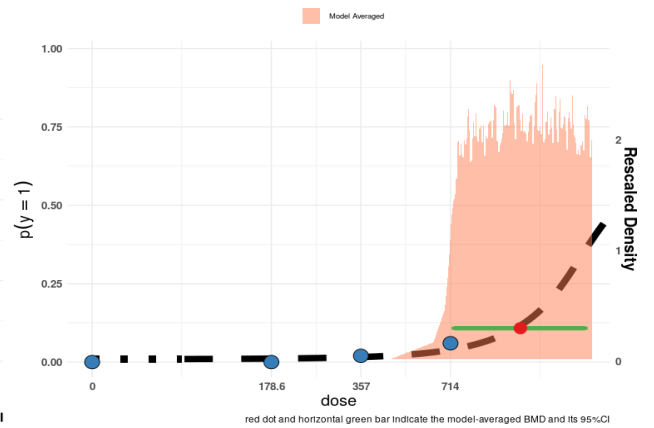

## 2.9. NTP (2014)–uterus atypical endometrial hyperplasia (n) in female Wistar Han rats exposed by gavage for 2 years to TBBPA–model averaging

### 2.9.1. Data description

The end point to be analysed is uterus atypical endometrial hyperplasia.

Data used for analysis

| TBBPA (mg/kg bw per day) | Uterus atypical endometrial hyperplasia (n) | Animals (n) |
|--------------------------|---------------------------------------------|-------------|
| 0.0                      | 2                                           | 50          |
| 178.6                    | 13                                          | 50          |
| 357.0                    | 11                                          | 50          |
| 714.0                    | 13                                          | 50          |

TBBPA: tetrabromobisphenol A.

### 2.9.2. Selection of the BMR

The BMR used is 10% set as default value for quantal data. The BMD is the dose corresponding with the BMR of interest.

A 90% confidence interval around the BMD will be estimated; the lower bound is reported by the BMDL, and the upper bound, by the BMDU.

### 2.9.3. Results

Response variable: **uterus atypical endometrial hyperplasia**

Estimated BMDs per model

| Model | BMDL    | BMD     | BMDU     | Model weights | Converged |
|-------|---------|---------|----------|---------------|-----------|
| E4_Q  | 38.459  | 197.615 | 1291.504 | 0.190         | 1         |
| IE4_Q | 39.599  | 178.186 | 1479.692 | 0.052         | 0         |
| H4_Q  | 34.468  | 176.327 | 935.755  | 0.216         | 1         |
| LN4_Q | 36.859  | 180.248 | 891.431  | 0.073         | 1         |
| G4_Q  | 33.244  | 191.512 | 692.348  | 0.166         | 1         |
| QE4_Q | 191.767 | 352.012 | 1019.558 | 0.119         | 1         |

Weights for model averaging

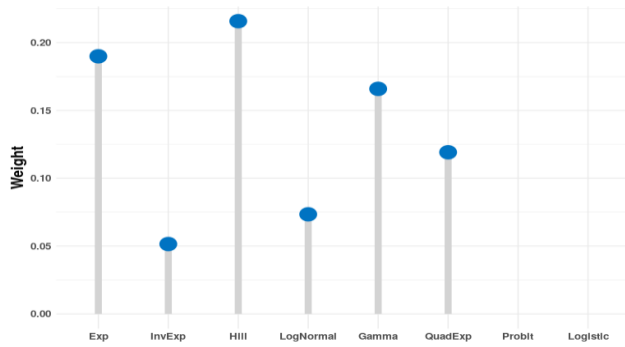

Final BMD values

| Model          | Type | BMDL   | BMD    | BMDU      |
|----------------|------|--------|--------|-----------|
| Model averaged | BS   | 41.631 | 222.61 | 1,090.156 |

Visualization

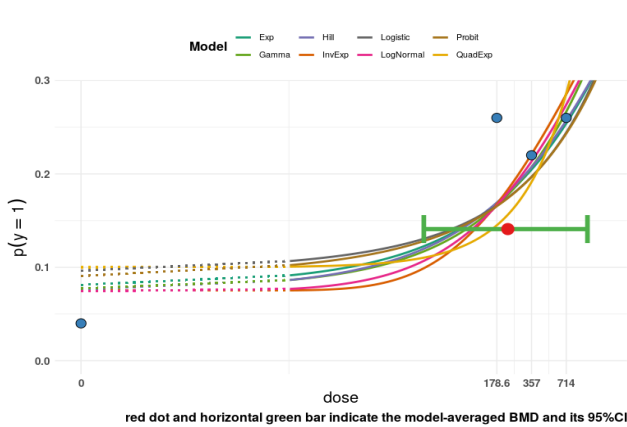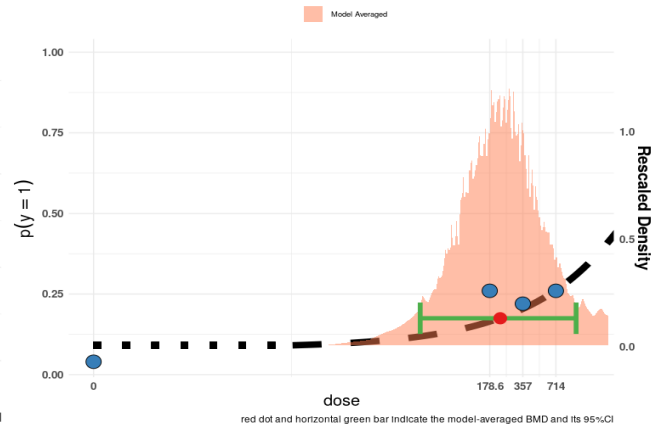

## References

- Cope RB, Kacew S and Dourson M, 2015. A reproductive, developmental and neurobehavioral study following oral exposure of tetrabromobisphenol A on Sprague-Dawley rats. *Toxicology*, 329, 49–59. doi: 10.1016/j.tox.2014.12.013
- EFSA CONTAM Panel (EFSA Panel on Contaminants in the Food Chain). (2024). Update of the risk assessment of polybrominated diphenyl ethers (PBDEs) in food. *EFSA Journal*, 22(1), e8497. <https://doi.org/10.2903/j.efsa.2024.8497>
- EFSA Scientific Committee, More SJ, Bampidis V, Benford D, Bragard C, Halldorsson TI, Hernandez-Jerez AF, Bennekou SH, Koutsoumanis K, Lambr e C, Machera K, Mennes W, Mullins E, Nielsen SS, Schrenk D, Turck D, Younes M, Aerts M, Edler L, Sand S, Wright M, Binaglia M, Bottex B, Abrahantes JC and Schlatter J, 2022. Guidance on the use of the benchmark dose approach in risk assessment. *EFSA Journal* 2022;20(10):7584, 67 pp. doi:10.2903/j.efsa.2022.7584
- Kim AH, Chun HJ, Lee S, Kim HS and Lee J, 2017. High dose tetrabromobisphenol A impairs hippocampal neurogenesis and memory retention. *Food and Chemical Toxicology: an International Journal Published for the British Industrial Biological Research Association*, 106, 223–231. doi: 10.1016/j.fct.2017.05.053
- National Toxicology Program (NTP), 2014. Toxicology studies of tetrabromobisphenol A in F344/NTac rats and B6C3F1/N mice and toxicology and carcinogenesis studies of tetrabromobisphenol A in Wistar Han [CrI:WI(Han)] rats and B6C3F1/N mice (gavage studies). National Toxicology Program Technical Report Series, (587), NTP-TR-587. doi: 10.22427/NTP-TR-587
- Rock KD, Gillera SEA, Devarasetty P, Horman B, Knudsen G, Birnbaum LS, Fenton SE and Patisaul HB, 2019. Sex-specific behavioral effects following developmental exposure to tetrabromobisphenol A (TBBPA) in Wistar rats. *Neurotoxicology*, 75, 136–147. doi: 10.1016/j.neuro.2019.09.003

## Abbreviations

|              |                                              |
|--------------|----------------------------------------------|
| BMD          | benchmark dose                               |
| BMDL         | benchmark dose lower confidence limit        |
| BMDU         | benchmark dose upper confidence limit        |
| BMR          | benchmark response                           |
| CONTAM Panel | EFSA Panel on Contaminants in the Food Chain |
| EFSA         | European Food Safety Authority               |
| LOAEL        | lowest-observed adverse effect level         |
| MMMT         | malignant mixed Mullerian tumour             |
| NOAEL        | no-observed-adverse-effects level            |
